# Supplementary material for: A conserved intronic U1 snRNP-binding sequence promotes trans-splicing in Drosophila
Source: PubMed Central journal article supplement — Genes Dev. 2015 Apr 1;29(7):760–71. doi: 10.1101/gad.258863.115 (PMC4387717; doi:10.1101/gad.258863.115), 2015-04-01
Supplement: supp_gad.258863.115_SuppFigs_Tables.pdf [file supp_gad.258863.115_SuppFigs_Tables.pdf]

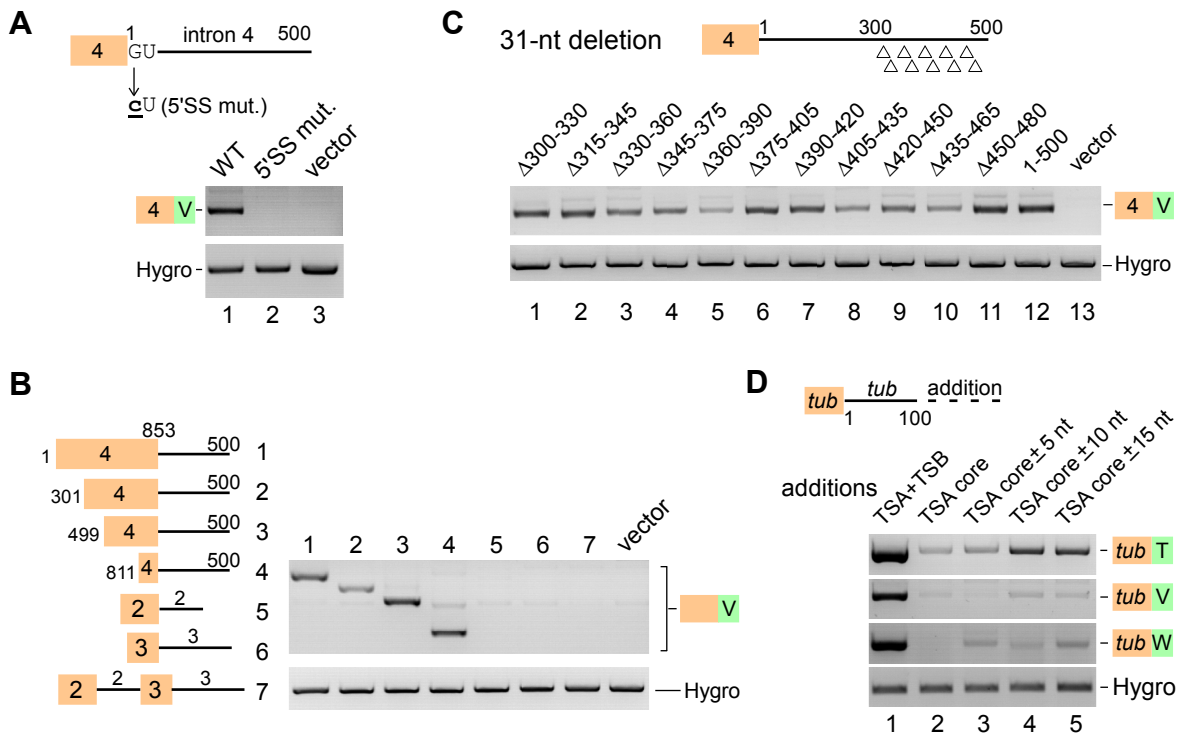

**Figure S1.** Identification of RNA elements that required for *trans*-splicing of *mod(mdg4)*.

(A) *Trans*-spliced product is not detectable when the first nucleotide at the 5'SS of intron 4 is mutated from G to C.

(B) Replacing intron 4 to other 5'-common introns of *mod(mdg4)* abolishes *trans*-splicing activity. However, shorten of the last 5'-exon 4 does not significantly alter *trans*-splicing activity.

(C) Tiled deletions of 31-nt in intron 4 (1-500 nt) reveals several fragments are important to *trans*-splicing activity.

(D) TSA core motif with short flanking sequences is sufficient to promote *trans*-splicing.

Boxes and labels are the same as in Figure 1.

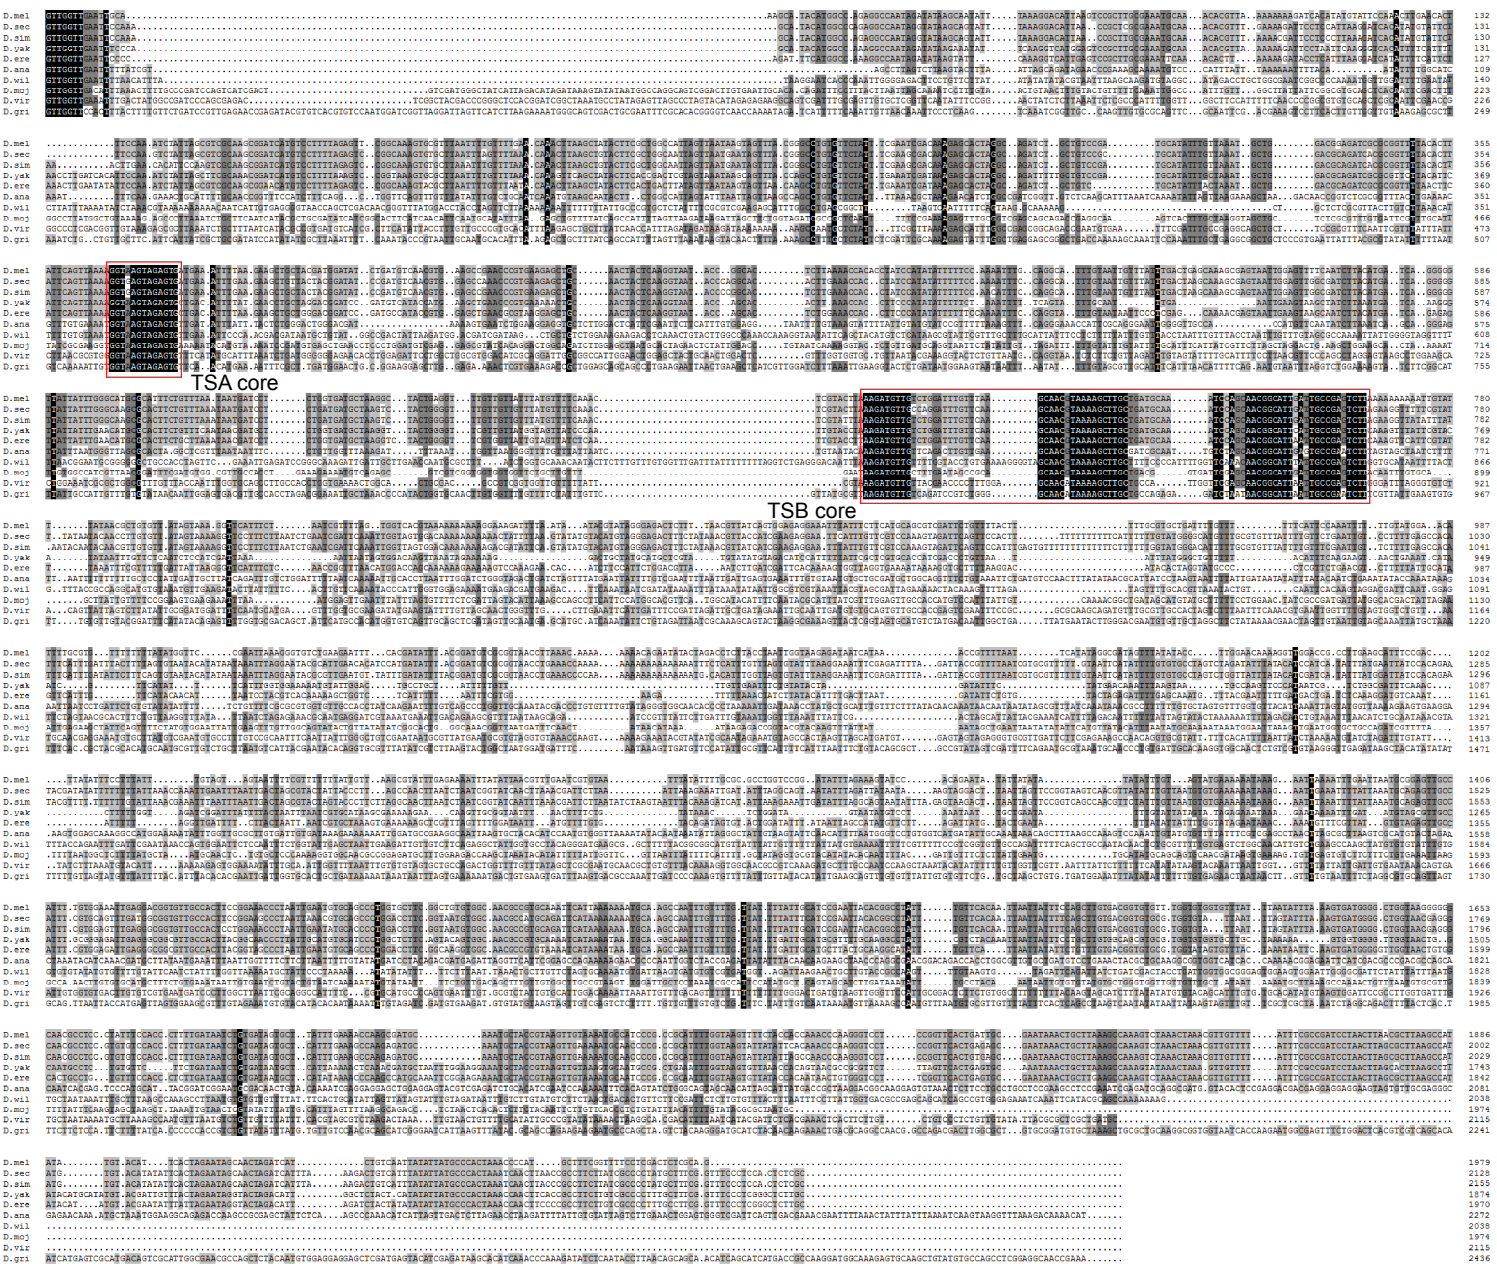

**Figure S2.** Sequences of *mod(mdg4)* intron 4 reveals two highly conserved RNA motifs across *Drosophila* species.

Intron 4 sequences from available *Drosophila* species were retrieved and aligned by DNAMAN. Regions of the highly conserved TSA core and TSB core are in red rectangles. Intron 4 from *D. persimilis* cannot be aligned due to missing of a genome fragment. Intron 4 from *D. pseudoobscura* was failed in the alignment, however its TSA core can be found by additional search using MEME software. Enlarged two regions are shown in Figure 2A.

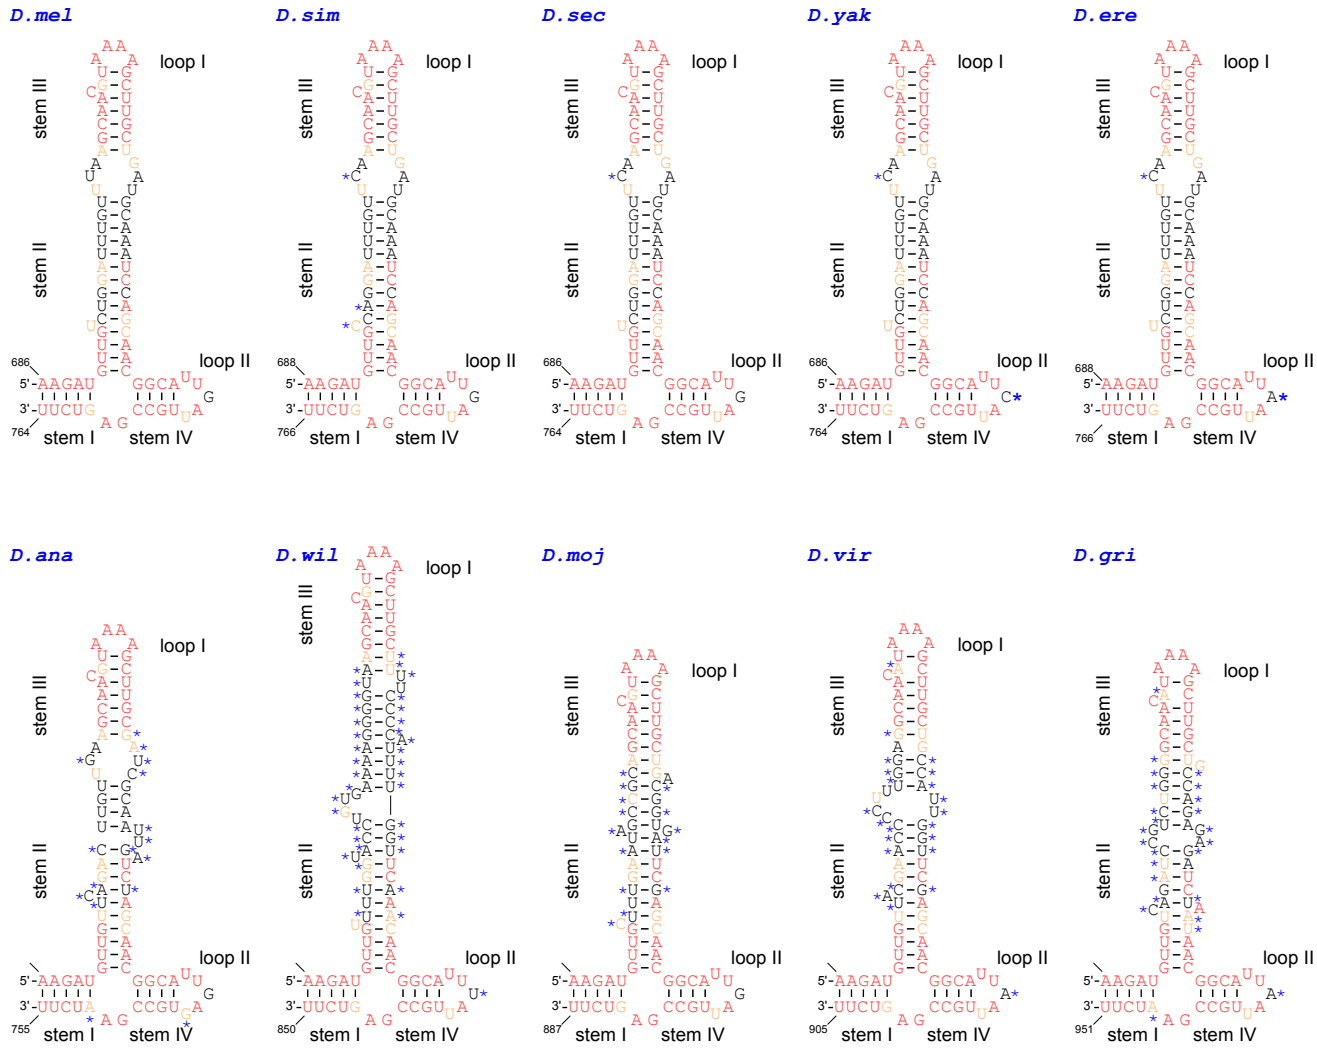

**Figure S3.** Conserved secondary structures of TSB core RNA across *Drosophila* species. Secondary structures are predicted by online Mfold server. Nucleotide conservation: red (100%); brown (>75%); black (<75%); asterisk (positions with different nucleotide from B core RNA in *D. melanogaster*).

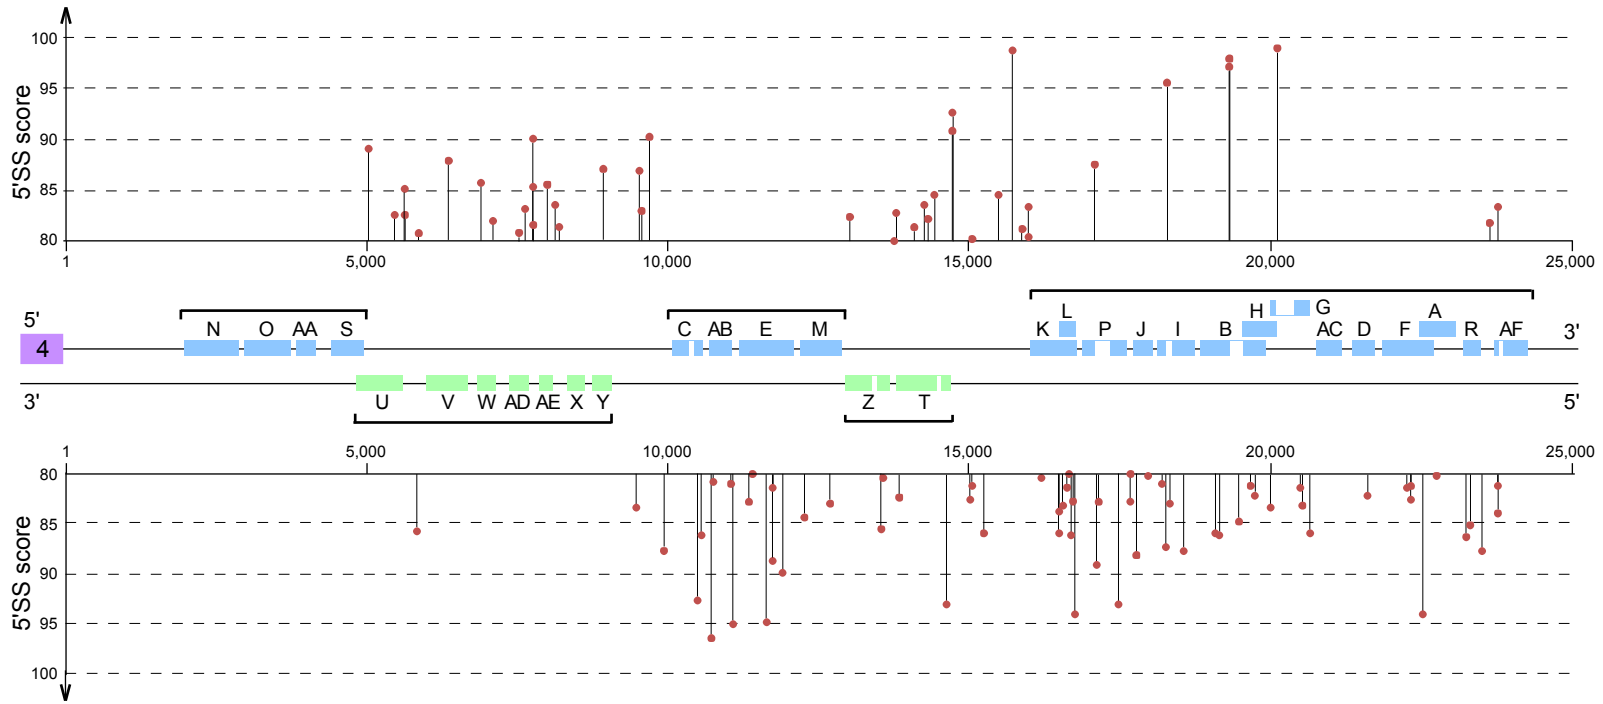

**Figure S4.** Potential 5'SS in the 3'-transcripts of *Drosophila mod(mdg4)*.

Potential 5'SS are predicted according to high scores (>80) by HSF software. Most of them are located in the UTR regions or internal *cis*-spliced introns (white boxes), but not between the alternatively *trans*-spliced exons.

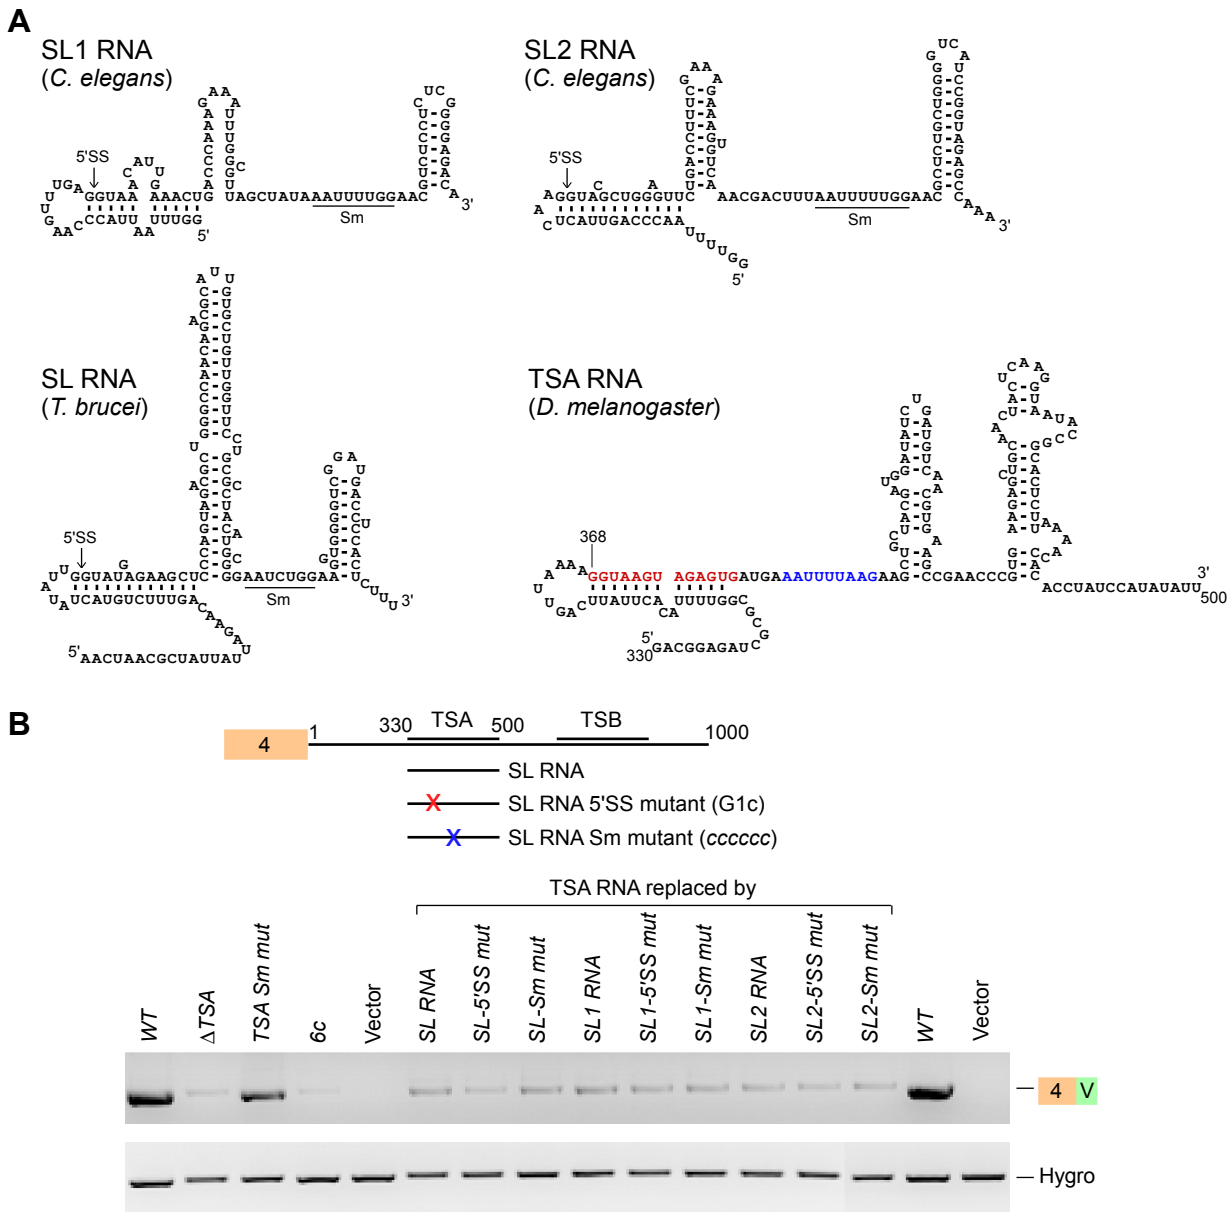

**Figure S5.** TSA RNA is not an analogue of SL RNA.

(A) Secondary structure of TSA RNA in *D. melanogaster* would be similar to SL RNAs. Three SL RNAs from *T. brucei* and *C. elegans* are adopted from (Bruzik *et al.*, 1988). TSA core motif and potential Sm-binding site in TSA RNA are colored.

(B) Replacing TSA RNA to SL RNAs do not significantly facilitates *trans*-splicing in S2 cells. For mutations in SL RNAs, the first nucleotide of 5'SS are mutated to cytosines, sequences of Sm-binding sites are mutated ccccc.

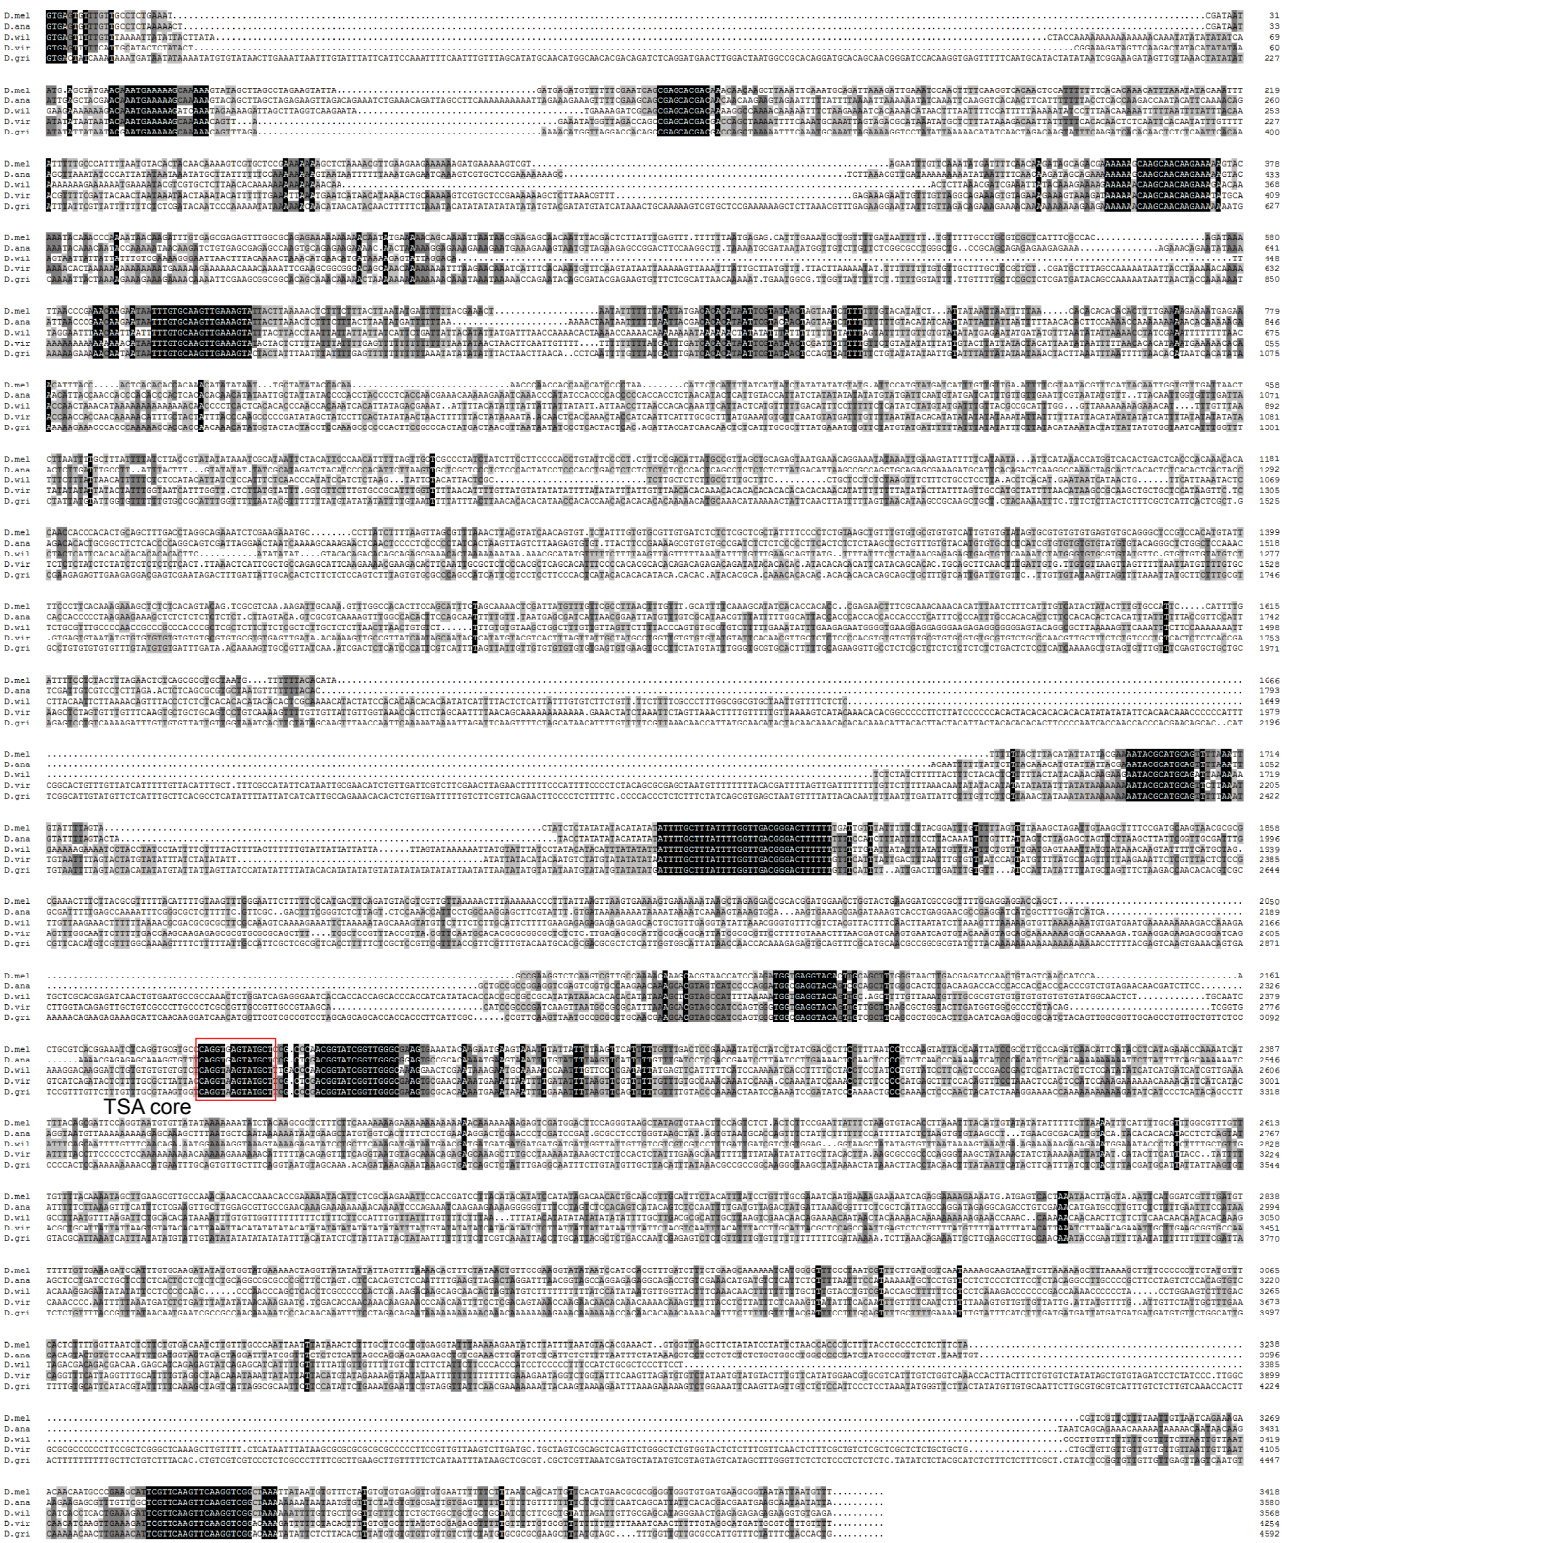

**Figure S6.** Sequence alignment of the last 5'-intron in *Iola* from *Drosophila* species.

Available sequences of intron 8 of *Iola* genes from five *Drosophila* species are retrieved and aligned. The conserved TSA core-like motif is indicated by red rectangle.

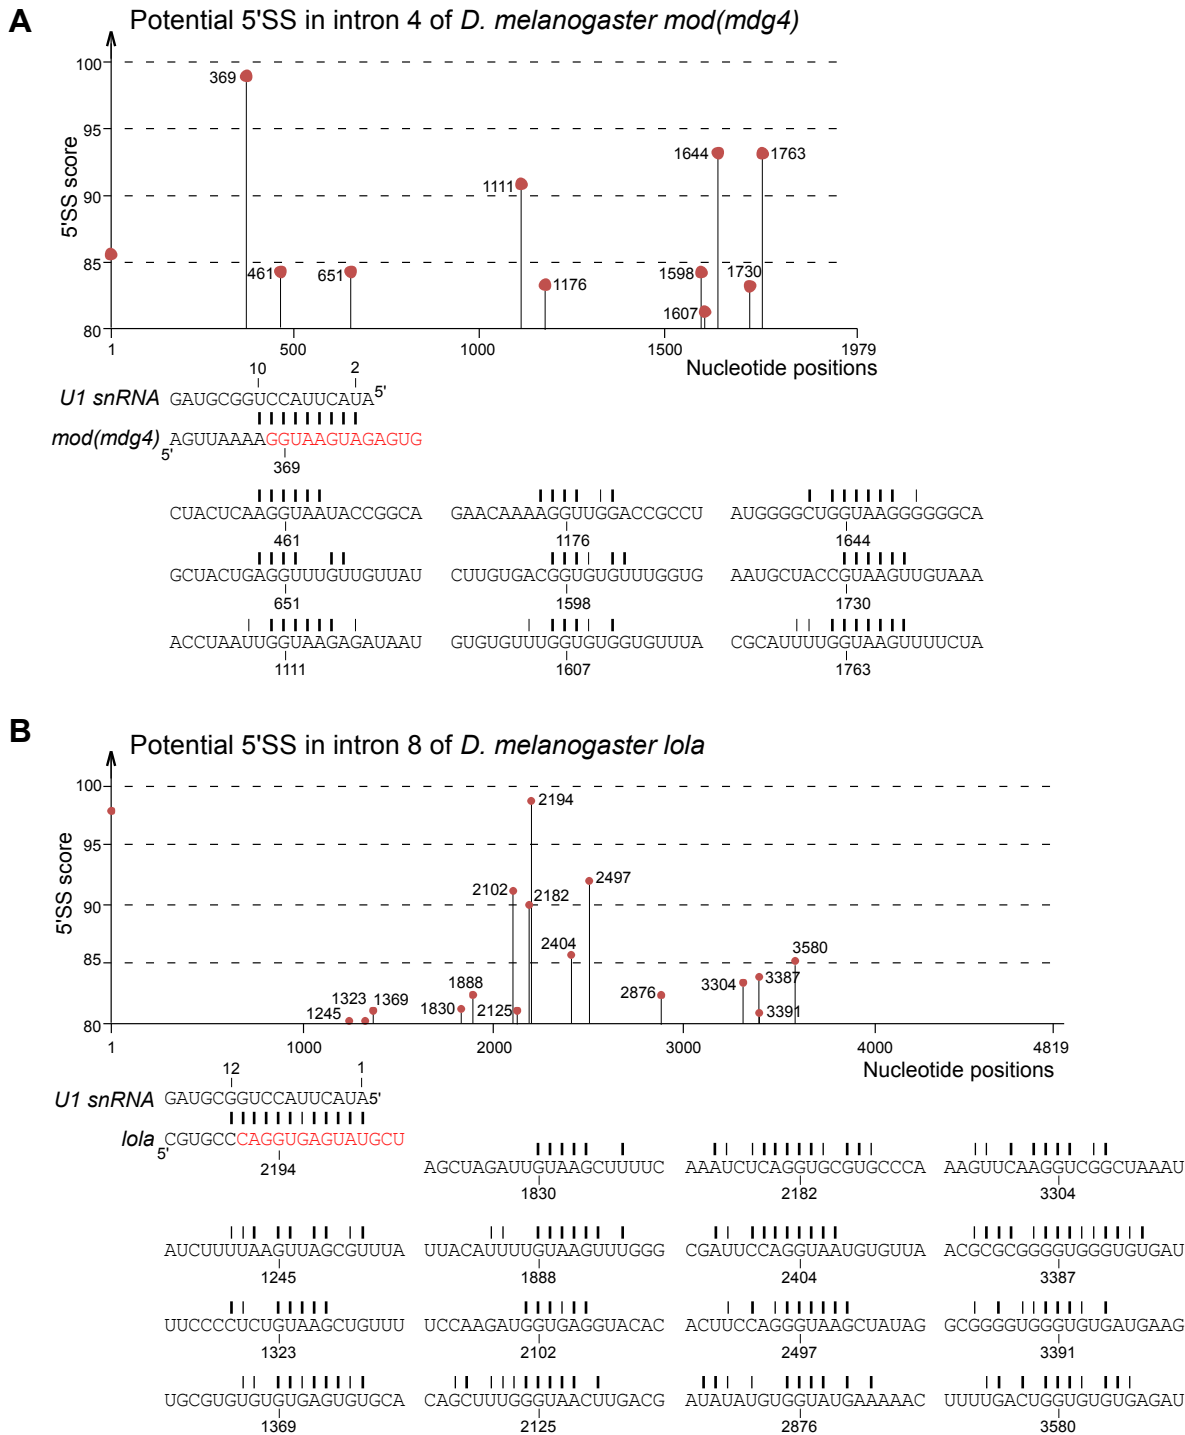

**Figure S7.** TSA core motif forms the strongest base-pairing with U1 snRNA.

Potential 5'SS in the last 5'-introns of *mod(modg4)* (A) and *lola* (B) are selected according to HSF scores (>80). For each gene, identified TSA core motif (red) forms the longest continuous base-pairs with the 5'-end of U1 snRNA, 9 bp in *mod(modg4)* and 12 bp in *lola*.

**GENESDEV/2015/258863 Gao\_TableS1**

**Table S1.** Proteins specifically associated with TSA and TSB RNAs.

|                           | <i>D. melanogaster</i> proteins          | # of Peptides | MW (KD) |
|---------------------------|------------------------------------------|---------------|---------|
| <b>TSA RNA associated</b> | <b>U1 snRNP</b>                          |               |         |
|                           | U1-70K                                   | 74            | 52.9    |
|                           | U1-A                                     | 4             | 24.5    |
|                           | SmB                                      | 7             | 21.0    |
|                           | SmD2                                     | 4             | 13.5    |
|                           | SmD3                                     | 2             | 15.6    |
|                           | SmE                                      | 6             | 11.1    |
|                           | SmG                                      | 4             | 8.5     |
| <b>TSB RNA associated</b> | Zinc finger protein on ecdysone puffs    | 50            | 78.0    |
|                           | Protein male-less                        | 39            | 143.6   |
|                           | PABP                                     | 18            | 69.9    |
|                           | Histone H4                               | 12            | 11.4    |
|                           | dLarp                                    | 6             | 178.0   |
|                           | ATP-dependent RNA helicase me31b         | 5             | 51.9    |
|                           | Histone H2A/e                            | 4             | 13.9    |
|                           | Symplekin                                | 4             | 132.0   |
|                           | CPSF 160                                 | 3             | 164.6   |
|                           | Testis-specific zinc finger protein topi | 2             | 92.1    |
|                           | HNRNP 40                                 | 2             | 36.2    |
|                           |                                          |               |         |
|                           | <b>U2 snRNP</b>                          |               |         |
| SF3B1                     | 2                                        | 145.7         |         |
| SF3A3                     | 1                                        | 58.4          |         |

Notes: Proteins associated with TSA, TSB and control RNAs are purified through amylose resin and identified by mass spectrometry (see experimental procedures). Specifically bound proteins are listed according to their absence in other two RNA affinity purification samples.



## GENESDEV/2015/258863 Gao\_TableS2

**Table S2.** TSA core-like motifs in other *Drosophila trans*-spliced genes.

| Annotation_id | Genome_loc  | Paired_seq            |
|---------------|-------------|-----------------------|
| CG9940        | X:13608279  | UCAG <u>GU</u> GGGUGU |
| CG9812        | 2R:19306751 | CAG <u>GU</u> GAGU    |
| CG9432        | 2R:2625000  | UGG <u>GU</u> AAGU    |
| CG8529        | 2R:8338098  | CUGG <u>GU</u> AAGU   |
| CG7470        | 3L:21972476 | UAG <u>GU</u> GAGUGU  |
| CG6946        | 3R:7642917  | CAG <u>GU</u> GGGU    |
| CG6803        | 3R:11002087 | CAG <u>GU</u> GGGUG   |
| CG4700        | 2R:12415185 | UCAG <u>GU</u> GAGUA  |
| CG34376       | 3R:18276869 | CAG <u>GU</u> AAGU    |
| CG32556       | X:17572059  | <u>GU</u> AAGUGU      |
| CG32490       | 3R:122224   | AG <u>GU</u> AAGUG    |
| CG32045*      | 3L:9647673  | CUGG <u>GU</u> AAGU   |
| CG32045*      | 3L:9636530  | <u>GU</u> GAGUAU      |
| CG18466*      | 3R:4872248  | CCAG <u>GU</u> GGGUA  |
| CG11326       | 2L:6690979  | UCAG <u>GU</u> AAGUG  |
| CG10851       | 3R:9488772  | CAG <u>GU</u> AAGUG   |

Notes: *Trans*-splicing events in *Drosophila* are obtained from (McManus et al., 2010) and the TSA core-like motifs in 5'-*trans* introns are retrieved from sequences that contain pseudo-5'SS (score >80 by HSF) and form at least 9 continuous base-pairs with the 5'-end of U1 snRNA. The first two nucleotides of pseudo-5'SS are underlined. All sequences are analyzed on the reference of *dmeL\_r5.11* from Flybase.

\*Experimentally confirmed events in (McManus et al., 2010).

**Table S3.** Major primers used in this study.

| Primer | Sequence (5' to 3')                                                                   | Notes                                                                                                            |
|--------|---------------------------------------------------------------------------------------|------------------------------------------------------------------------------------------------------------------|
| FYJ059 | AATGCTGGACGGAGATCGCG                                                                  | sgRNA target sequences for <i>mod(mdg4)<sup>ΔTSA</sup></i> (Δ340-487 nt)                                         |
| FYJ062 | CACCTATCCATATATTTTTC                                                                  |                                                                                                                  |
| FYJ063 | TGGTGATGCTAAGGCTACTG                                                                  | sgRNA target sequences for <i>mod(mdg4)<sup>ΔTSB</sup></i> (Δ646-799 nt)                                         |
| FYJ065 | ATAACGCTGTGTTATAGTAA                                                                  |                                                                                                                  |
| FYJ110 | ACGAGCAATTCAGCTTGTGC                                                                  | sgRNA target sequences for <i>mod(mdg4)<sup>Δcom</sup></i> (deletion from exon 2-72 nt to Intron 4-1018 nt)      |
| FYJ112 | AATTAAAGGGTGTCTGAAGA                                                                  |                                                                                                                  |
| FYJ073 | GGATCCATGGTGACATCATTTTCAT                                                             | For amplification of the 6690-bp WT fragment in rescue construct                                                 |
| FYJ074 | ATAGGCCGTGTAATTCGGATGCAA                                                              |                                                                                                                  |
| G-916  | CCCGATGTGACTAGCTCTTTGCTGCAGGCCGT<br>CCTATCCTCTGGTTCCGATAGTTGGCCAGGTTA<br>CCCGGCCAAAC  | For cloning of U1 snRNA gene into the pMT-hygro vector, these two oligos were used for homologous recombination. |
| G-918  | AGCCATACCACATTTGTAGAGGTTTTACTTGCT<br>TTAAAAAACCTCCCACACCCCTCAACCACAAG<br>CCCTTCACCTAC |                                                                                                                  |
